# Supplementary material for: Isoprene derived secondary organic aerosol in a global aerosol chemistry climate model
Source: Copernicus journal article supplement (doi:10.5194/gmd-2017-244), 2017-10-16
Supplement: Supplementary file 1 [file gmd-2017-244-supplement.zip]

Archive with 2 entries (2 files):
- supplement1.pdf
- supplement2.pdf
