# Supplementary material for: Isoprene derived secondary organic aerosol in a global aerosol chemistry climate model
Source: Copernicus journal article supplement (doi:10.5194/gmd-2017-244), 2017-10-16
Supplement: Supplementary file 1 [file gmd-2017-244-supplement.zip › supplement2.pdf]

Stadtler, S. et al.: Isoprene derived secondary organic aerosol in a global aerosol chemistry climate model

## Supplement 2

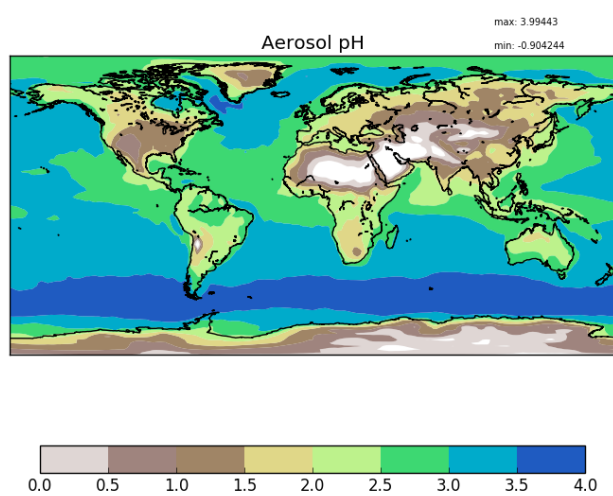

Figure S1: Aerosol pH values as calculated by AIM and used as input values in ECHAM-HAMMOZ to calculate IEPOX reaction probability.
