# Supplementary material for: Isoprene derived secondary organic aerosol in a global aerosol chemistry climate model
Source: Copernicus journal article supplement (doi:10.5194/gmd-2017-244), 2017-10-16
Supplement: Supplementary file [file gmd-2017-244-RC2-supplement.pdf]

## Review of “Isoprene derived secondary organic aerosol in a global aerosol chemistry climate model”

By Stadtler *et al.* for *Geosci. Model Dev. Discussion*

### General Comments

In this manuscript, the authors have developed the global chemistry climate model ECHAM-HAMMOZ to include a more explicit coupling between the gas and particle phase models in order to describe the formation isoprene derived secondary organic aerosol (SOA). With their model, they predict that most of the iSOA is produced by IEPOX and Isop(OOH)<sub>2</sub>. This ultimately leads to over predictions of iSOA in relatively pristine locations where models typically under predict SOA in general. There seems to be a growing tendency in the literature for models to capture ever increasing complexity in the chemical mechanisms because they are more capable of describing the wide variance of atmospheric conditions. For this reason, I believe this manuscript has a lot of value to interested readers. However, it is incumbent on the developers to describe in detail all the relevant additions to the mechanism and justify other aspects that were not considered. I feel that certain aspects of the chemical mechanism were not adequately characterized in this manuscript. For example, there was no discussion on HO<sub>x</sub> recycling in the mechanism (an important facet in low NO<sub>x</sub> regimes) or how specifically all the percentage yields in Figure 1 were obtained – both of which affect oxidation state, product yields and branching ratios – and therefore model results. For this reason, I would reconsider this publication after addressing the major and minor revisions detailed below.

### Specific Comments

1. The chemical mechanism as shown in Figure 1 contains many percentage yields. The authors described the reaction pathways and mentioned yields in the text on pages 6 and 7 although they either did not provide references or a brief discussion of how the yields were obtained. It may be stated in another reference but the crucial reaction yields shown in the figure need to be justified. For example, how was the 9% gas phase yield of LISOPOOHOOH obtained or how was the 1% gas phase yield of LC578OOH determined? It is these numbers which will directly affect SOA yields and it is therefore crucial to understand their uncertainties based on how they were derived. A discussion with pertinent references should be included on pages 6 and 7.
2. HO<sub>x</sub> recycling remains an issue in atmospheric chemistry models because HO<sub>x</sub> levels are typically under predicted in areas of low NO<sub>x</sub>. [Archibald *et al.*, “Impacts of HO<sub>x</sub> regeneration and recycling in the oxidation of isoprene: Consequences for the composition of past, present and future atmospheres”, *Geophys. Res. Letters*, 2011, L05804.] Certain reactions will rapidly consume HO<sub>x</sub> such as the formation of LISOPOOHOOH (2 OH and 2 HO<sub>2</sub> radicals typically consumed) while other reactions will recycle HO<sub>x</sub> such as the ring closure reaction of the IsopOOH-(OH)<sub>2</sub> radical to form IEPOX or intramolecular hydrogen shift reactions. The consumption of HO<sub>x</sub> species has been expressed in the R1-R22 reactions but there seems to be no mention of HO<sub>x</sub> species regeneration which affects the oxidative capacity of the atmosphere in regions of low NO<sub>x</sub>. For example, reaction R3 will release OH radicals when IEPOX is produced but this is not specified in the reaction. A hydrogen shift reaction (not really discussed in any of the reactions as far as I can tell) may produce carbon centered radicals at hydroxyl sites that may react with O<sub>2</sub> to yield a carbonyl compound and HO<sub>2</sub>. These regenerated HO<sub>x</sub> species are

important and need to be accounted for and/or discussed in the paper in the section describing these reactions.

3. On page 6 of the manuscript (line 7) it states: "Not included is the H-shift of LISOPOOHO<sub>2</sub> that yields much more volatile compounds than LISOPOOHOOH". I do not agree with the authors that the compounds produced would be 'much more volatile' and therefore are not relevant to particle phase partitioning. If a 1,5-H-shift occurs in LISOPOOHO<sub>2</sub>, it would lead to a compound similar to LC578OOH except it would be heavier by one oxygen atom (i.e. a hydroxy-dihydroperoxy carbonyl derivative instead of the LC578OOH diol). Because LC578OOH partitions to the particle phase, so too would this newly produced compound derived from an H-atom shift. This product is indeed less volatile than LISOPOOHOOH, but it would be expected to partition into a particle phase thereby decreasing the influence of LISOPOOHOOH in the mechanism.
4. The product branching ratios for the subsequent reactions of IsopO<sub>2</sub> in Figure 1 seem fixed regardless of the environment. Is this the intended assumption? Because all the subsequent reactions of IsopO<sub>2</sub> are bimolecular, the branching ratios (and therefore product yields) will depend on the relative concentrations of RO<sub>2</sub>, HO<sub>2</sub> and NO radicals. The gas phase product yields will therefore not only be influenced by local isoprene concentrations but also on the relative concentrations of these radicals. A discussion of this effect should be included in the manuscript along with a justification as to why using these fixed values represents an average isoprene environment.
5. The acronyms used to describe the chemical mechanism are not very clear. For instance, I cannot figure out what IsopOH is. I presume that IsopOOH is a hydroxy-hydroperoxy isoprene species (of which there are 8 isomers) so does that mean IsopOH is the diol? Chemical structures for all species listed in Table 1 and Figure 1 would be extremely useful.
6. In the chemical mechanism, there is no mention of dinitrate formation which is likely to occur in high NO<sub>x</sub> environments.[see Piletic et al. "Barrierless Reactions with Loose Transition States Govern the Yields and Lifetimes of Organic Nitrates Derived from Isoprene", J. Phys. Chem. A, 2017, 8306 and Jenkin et al. "The MCM v3.3.1 degradation scheme for isoprene", Atmos. Chem. Phys., 2015, 11433.] These species are highly oxidized and relatively heavy and therefore may affect the SOA yield in high NO<sub>x</sub> regime.

### Technical Comments

1. On page 3 line 21, remove "the" for "In the light of ..."
2. On page 5 line 14, replace "..., it is referred to the ..." with "..., the reader is referred to the ..."
3. On page 5 line 17, replace "Also the O<sub>3</sub> initiated reactions pathways are included in MOZ, but none of the products was low volatile enough." with "The O<sub>3</sub> initiated reaction pathways are included in MOZ, but the products are too volatile to contribute to SOA."
4. On page 9 line 17, add a comma between the words "dependence" and "sensitivity".
5. On page 9 line 25, replace "...processes to only the aerosol sized that are relevant..." with "...processes to include only the aerosol sizes that are..."
6. On page 9 line 30, replace "Here this model..." with "Here, the model..."

7. On page 12 line 24, replace "... especially LISOPOOHOOH molar mass of 168.14 g/mol is very large." with "...especially due to LISOPOOHOOH which has a molar mass of 168.14 g/mol that is very large."
8. On page 14 line 2, replace "... 2-methyltetrols in the order of ng/m<sup>3</sup> are measured in..." with "... 2-methyltetrols are present in ng/m<sup>3</sup> concentrations in the..."
9. On page 14 lines 9 and 18, the sentences are poorly expressed and need to be rewritten (i.e. "On the LISOPOOHOOH-SOA plot..." and "Hodzic et al...")
10. On page 14 line 33, the sentence should read "24% of isoprene ends up as IEPOX, 9% as LISOPOOHOOH, ..." where every 'in' is replaced with 'as'
11. On page 15 line 7, it should read "The majority of precursors are destroyed chemically ..."
12. On page 15 line 19, replace "... AeroCom mean value, because iSOA..." with "... AeroCom mean value because the iSOA..."
13. On page 17 line 5, remove "motivated" (word duplicated)
14. On page 17 line 21, replace "in contrary as can be seen in Figure 5 iSOA..." with "On the contrary as can be seen in Figure 5, iSOA..."
15. On page 20 line 14, replace "...of the various different organic ..." with "...for the different organic compounds..."
16. On page 20 line 17, replace "...using for all of them 30 kJ/mol." with "using 30 kJ/mol as the  $\Delta H_{\text{vap}}$ ."
17. On page 21 line 11, replace the word 'at' with 'for' at the end of the line.
18. On page 21 line 14, switch the order of "holds also" to "also holds".
19. On page 22 line 20, remove the word 'atmospheric' (redundant).
20. On page 22 line 21, add the word 'the' before AMS at the end of the line.
21. On page 25 line 3, replace the word 'pure' with 'purely'.
22. On page 25 line 8, the sentence either needs to be split up or more clearly stated.
23. On page 26 line 12, add the word 'the' between 'has most'
24. On page 26 line 16, add the word 'by' between 'followed OH'
25. On page 26 line 17, the sentence should read "... NO<sub>x</sub> dependent pathways..."
